# Supplementary material
Source: HighWire-hosted journal article supplement (https://bmjopen.bmj.com/content/14/5/e081118)
Supplement: inline-supplementary-material-1 [file inline-supplementary-material-1.pdf]

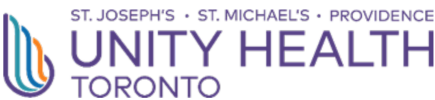

Search Strategy

David Lightfoot  
Information Specialist  
Library Services  
Unity Health Toronto  
David.Lightfoot@unityhealth.to

To: [Karen.Burns@unityhealth.to](mailto:Karen.Burns@unityhealth.to)

| Database(s) Searched              | 2014 | 2018 | 2020 |
|-----------------------------------|------|------|------|
| All Ovid Medline <1946 - present> | 745  | 627  | 724  |

Search Strategy

All Ovid Medline <1946 - present>

- 1"new england journal of medicine".jn. 81679
- 2jama.jn. 76790
- 3BMJ.jn. 83403
- 4lancet.jn. 140037
- 5"annals of internal medicine".jn. 35647
- 61 or 2 or 3 or 4 or 5 417556
- 7(Randomized Controlled Trial or Controlled Clinical Trial or Pragmatic Clinical Trial or Equivalence Trial or Clinical Trial, Phase III).pt. [begin CADTH randomized controlled trials - OVID Medline, Embase, PsychINFO] 642129
- 8exp Randomized Controlled Trials as Topic/ 153273
- 9"Randomized Controlled Trial (topic)"/ o
- 10Controlled Clinical Trial/ 94492
- 11exp Controlled Clinical Trials as Topic/ 158886

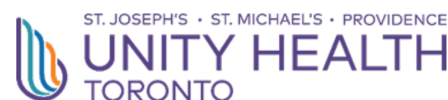

|    |                                                                                                                       |         |
|----|-----------------------------------------------------------------------------------------------------------------------|---------|
| 12 | Controlled Clinical Trial/                                                                                            | 94492   |
| 13 | exp Controlled Clinical Trials as Topic/                                                                              | 158886  |
| 14 | "Controlled Clinical Trial (topic)"/                                                                                  | 0       |
| 15 | Randomization/                                                                                                        | 106097  |
| 16 | Random Allocation/                                                                                                    | 106097  |
| 17 | Single-Blind Studies/                                                                                                 | 31072   |
| 18 | Placebos/                                                                                                             | 35730   |
| 19 | Placebo/                                                                                                              | 0       |
| 20 | Control Groups/                                                                                                       | 1780    |
| 21 | (random* or sham or placebo*).ti,ab,hw,kf,kw.                                                                         | 1638470 |
| 22 | ((singl* or doubl*) adj (blind* or dumm* or mask*)).ti,ab,hw,kf,kw.                                                   | 251492  |
| 23 | ((tripl* or trebl*) adj (blind* or dumm* or mask*)).ti,ab,hw,kf,kw.                                                   | 1270    |
| 24 | (control* adj3 (study or studies or trial* or group*)).ti,ab,kf,kw.                                                   | 1089335 |
| 25 | (Nonrandom* or non random* or non-random* or quasi-random* or quasirandom*).ti,ab,hw,kf,kw.                           | 48746   |
| 26 | allocated.ti,ab,hw.                                                                                                   | 73834   |
| 27 | ((open label or open-label) adj5 (study or studies or trial*)).ti,ab,hw,kf,kw.                                        | 39108   |
| 28 | ((equivalence or superiority or non-inferiority or noninferiority) adj3 (study or studies or trial*)).ti,ab,hw,kf,kw. | 9985    |
| 29 | (pragmatic study or pragmatic studies).ti,ab,hw,kf,kw.                                                                | 492     |
| 30 | or/7-29                                                                                                               | 2341343 |
| 31 | 6 and 30                                                                                                              | 29263   |
| 32 | limit 31 to yr="2014"                                                                                                 | 745     |
| 33 | limit 31 to yr="2018"                                                                                                 | 627     |
| 34 | limit 31 to yr="2020"                                                                                                 | 724     |
